# Supplementary material
Source: Springer Nature journal article supplement (https://www.springermedizin.de/resource/supplementary/12936_2014_3668_MOESM2_ESM.pdf/9546218)

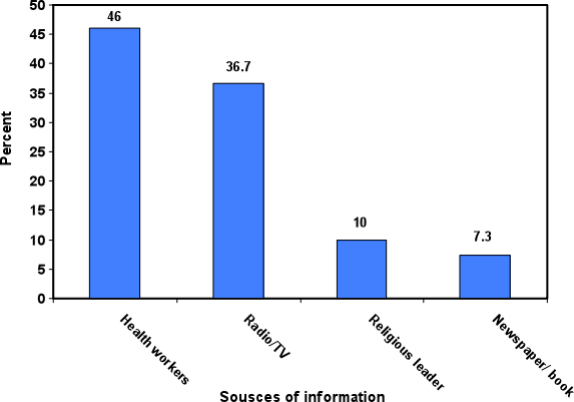

Supplement: MOESM2 [file 9546218]
